# Supplementary material for: Mckelveyite group minerals – Part 4: Alicewilsonite-(YLa), Na2Sr2YLa(CO3)6 ⋅ 3H2O, a new lanthanum-dominant species from the Paratoo mine, Australia
Source: Copernicus journal article supplement (doi:10.5194/ejm-36-301-2024), 2024-03-22
Supplement: Supplementary file 1 [file ejm-36-301-2024-supplement.zip]

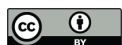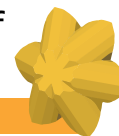

*Supplement of*

**Mckelveyite group minerals – Part 4: Alicewilsonite-(YLa),  $\text{Na}_2\text{Sr}_2\text{YLa}(\text{CO}_3)_6 \cdot 3\text{H}_2\text{O}$   
a new lanthanum-dominant species from the Paratoo mine, Australia**

**Inna Lykova et al.**

*Correspondence to:* Inna Lykova (ilykova@nature.ca)

- ejm-36-301-2024-supplement-title-page.pdf
- alicewilsonite-(YLa).cif
- alicewilsonite-(YLa).xy

The copyright of individual parts of the supplement might differ from the article licence.
